# Supplementary material for: Sustainable and Green Synthesis of Waste-Biomass-Derived Carbon Dots for Parallel and Semi-Quantitative Visual Detection of Cr(VI) and Fe3+
Source: MDPI journal article supplement (doi:10.3390/molecules27041258), 2022-02-13
Supplement: s1 [file s1]

# Sustainable and Green Synthesis of Waste-Biomass-Derived Carbon Dots for Parallel and Semi-Quantitative Visual Detection of Cr(VI) and Fe<sup>3+</sup>

Lan Xia <sup>1,†</sup>, Xiuju Li <sup>2,†</sup>, Yuanhua Zhang <sup>1</sup>, Kai Zhou <sup>3</sup>, Long Yuan <sup>1</sup>, Rui Shi <sup>4,\*</sup>, Kailian Zhang <sup>1</sup> and Qifeng Fu <sup>1,\*</sup>

<sup>1</sup> Department of Pharmaceutical Analysis, School of Pharmacy, Southwest Medical University, Luzhou 646000, China; 20200599120020@stu.swmu.edu.cn (L.X.); 20190599120011@stu.swmu.edu.cn (Y.Z.); 20210599120022@stu.swmu.edu.cn (L.Y.); zkl66@swmu.edu.cn (K.Z.)

<sup>2</sup> School of Pharmacy, Tongren Polytechnic College, Tongren 554300, China; lxj\_trzy@163.com

<sup>3</sup> Analytical and Testing Center, Chongqing University, Chongqing, 401331, China; zhokai2016@cqu.edu.cn

<sup>4</sup> Emergency Department, The Affiliated Traditional Chinese Medicine Hospital of Southwest Medical University, Southwest Medical University, Luzhou, Sichuan 646000, China

\* Correspondence: Sherry0503s@163.com (R.S.); fuqifeng@swmu.edu.cn (Q.F.); Tel.: +86-830-25-23-333 (R.S.); Tel.: +86-830-31-61-291 (Q.F.)

† These authors contributed equally to this work.

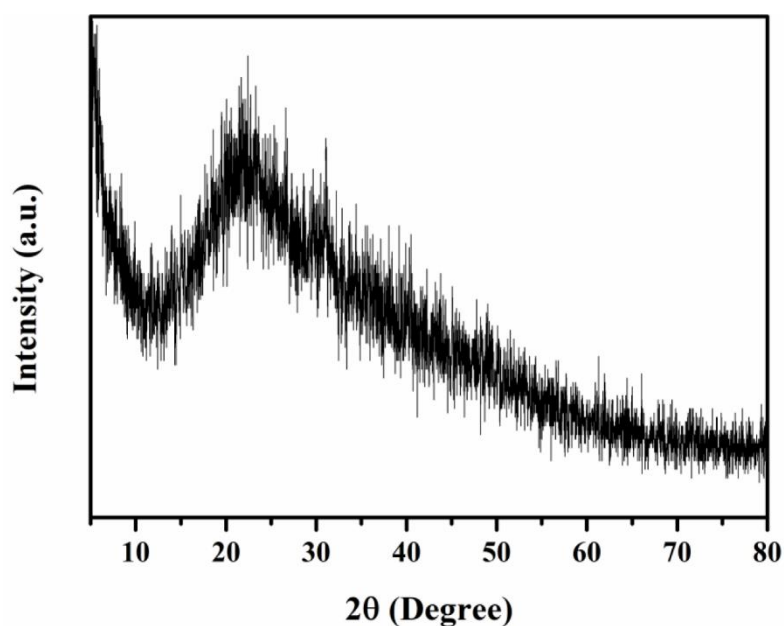

Figure S1. XRD patterns of the prepared FW-CDs.

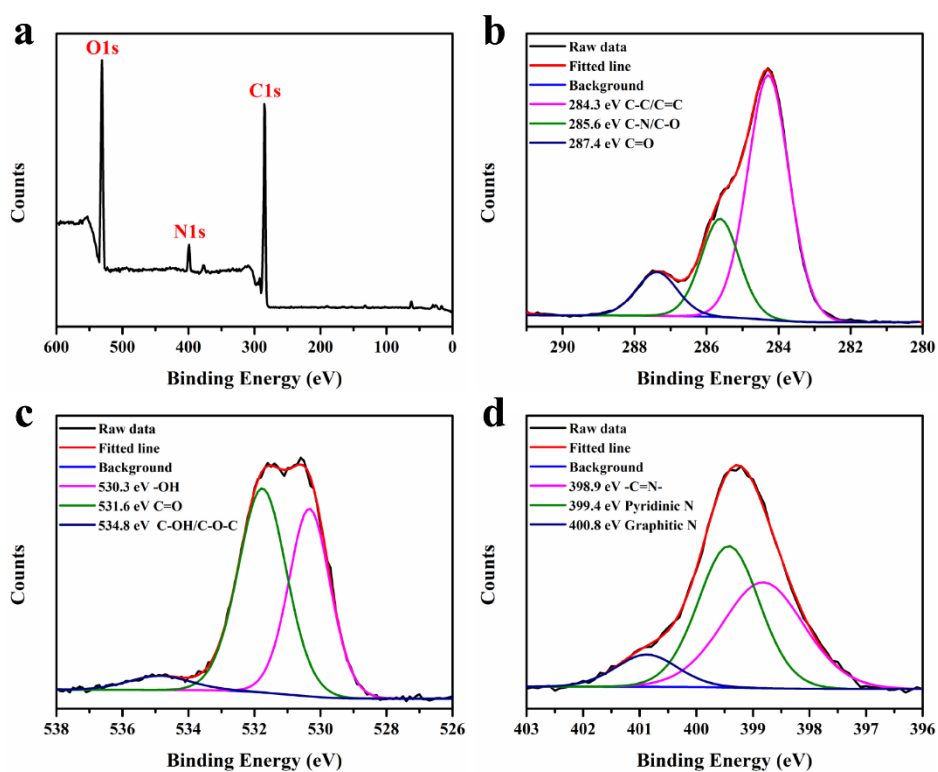

Figure S2. (a) Full XPS spectrum of FW-CDs; (b) High-resolution C 1s XPS spectrum; (c) O 1s XPS spectrum; (d) N 1s XPS spectrum of FW-CDs.

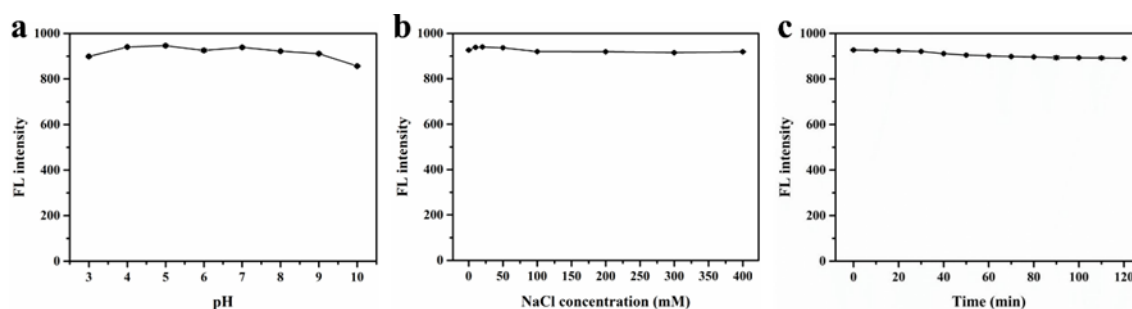

**Figure S3.** (a) The fluorescence intensity of FW-CDs at different pH values; (b) Effect of NaCl concentration on the fluorescence intensity of FW-CDs; (c) Photostability of FW-CDs irradiated by xenon lamp for different amounts of time. (The error bar was not obvious due to the small fluctuation of data).

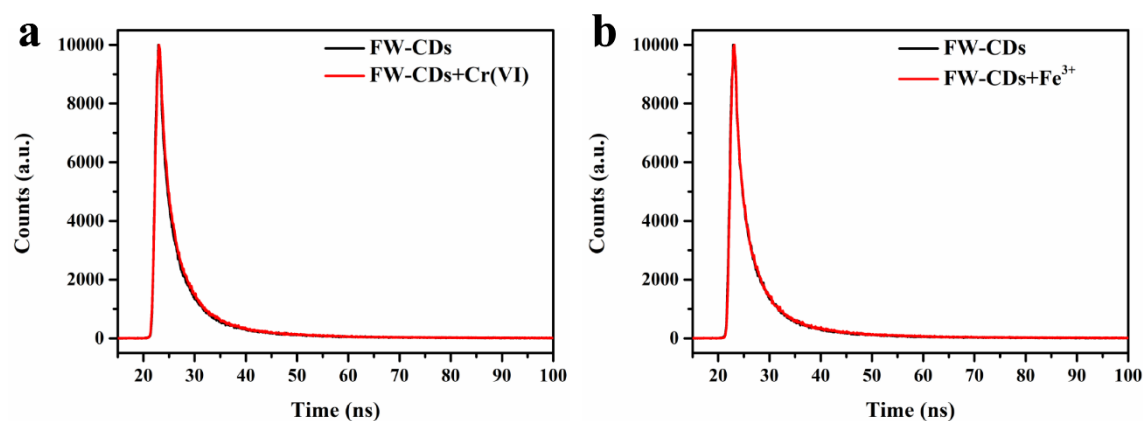

**Figure S4.** Fluorescence decay curve of as-prepared FW-CDs in the absence and presence of Cr(VI) (a) and Fe<sup>3+</sup> (b) with excitation at 375 nm.

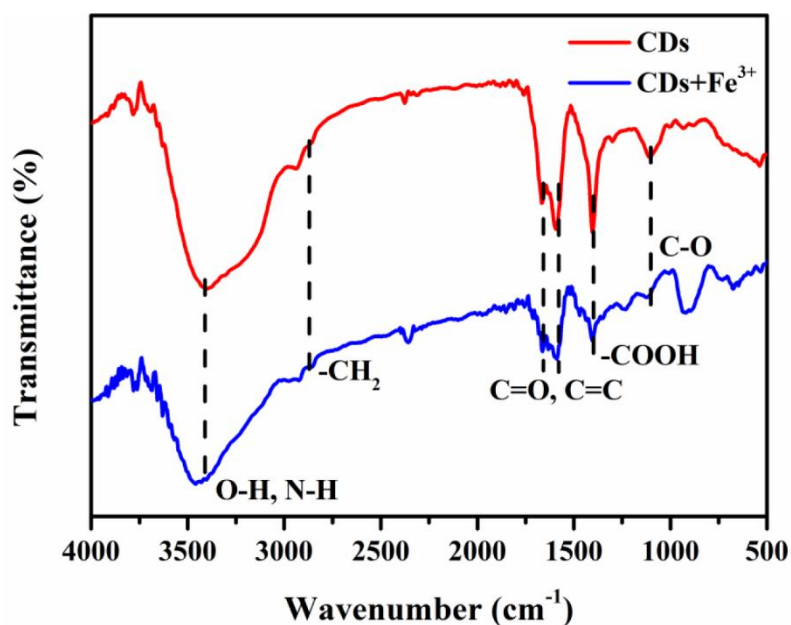

**Figure S5.** FTIR spectra of the FW-CDs and FW-CDs/Fe<sup>3+</sup> mixture.

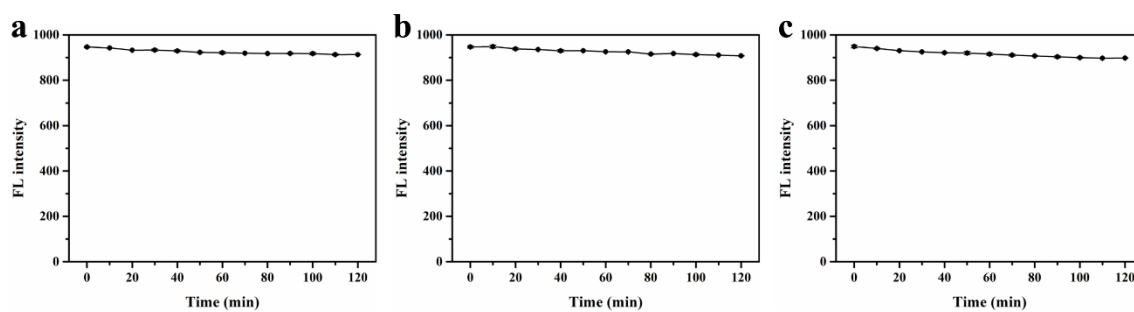

**Figure S6.** Photostability of FW-CDs irradiated by xenon lamp for different amounts of time in tap (a), lake (b), river water (c). (The error bar was not obvious due to the small fluctuation of data).

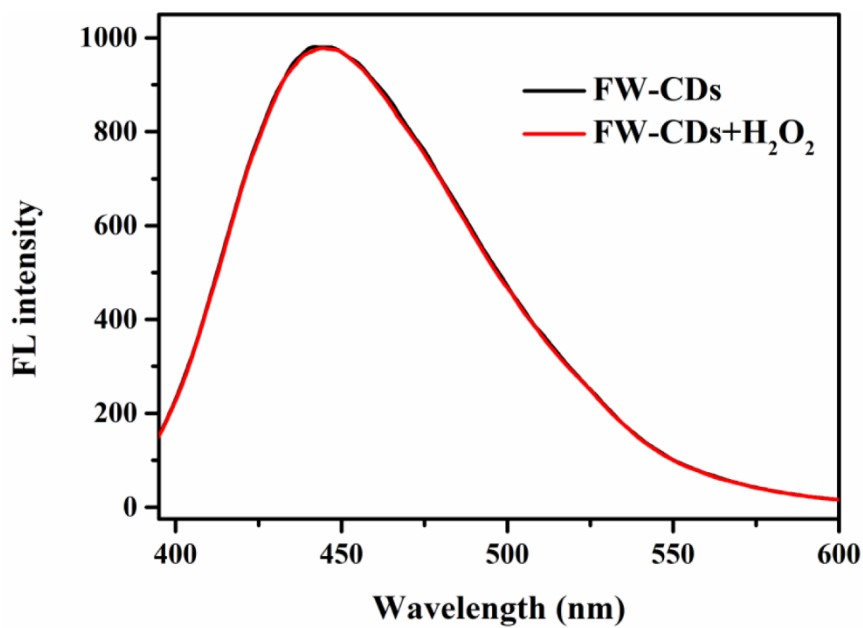

**Figure S7.** The fluorescence intensity changes of FW-CDs in the absence and presence of 500  $\mu\text{M}$  H<sub>2</sub>O<sub>2</sub>.

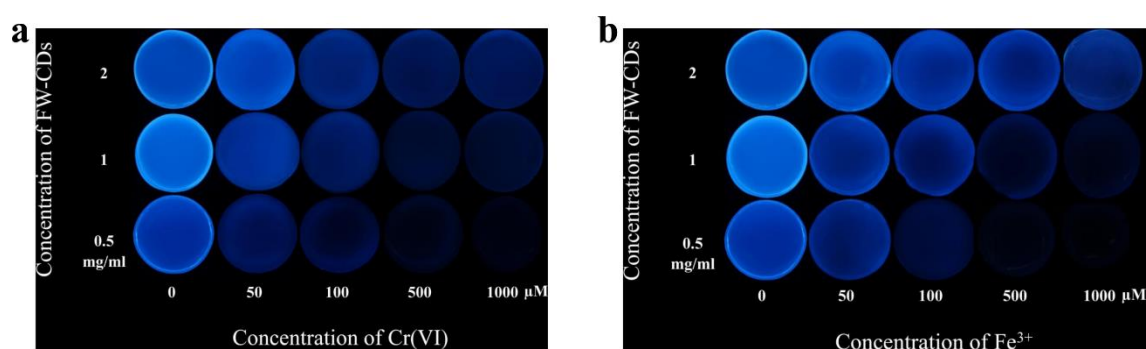

**Figure S8.** Comparison of the fluorescence intensity of FW-CDs hydrogels containing different concentrations of FW-CDs in the presence of different amounts of Cr(VI) (a) and Fe<sup>3+</sup> (b).

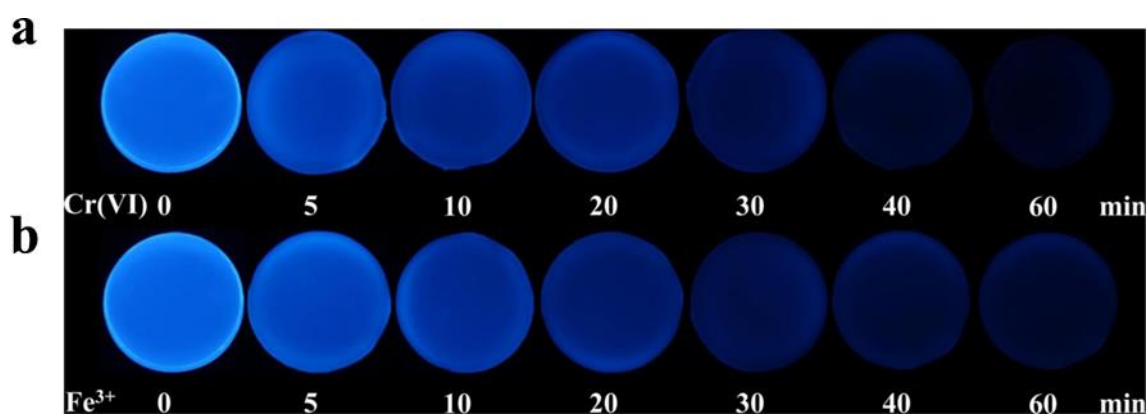

**Figure S9.** The fluorescence quenching effect of FW-CD hydrogels in 100  $\mu$ M Cr(VI) (a) and Fe<sup>3+</sup> (b) solution at different incubating time.

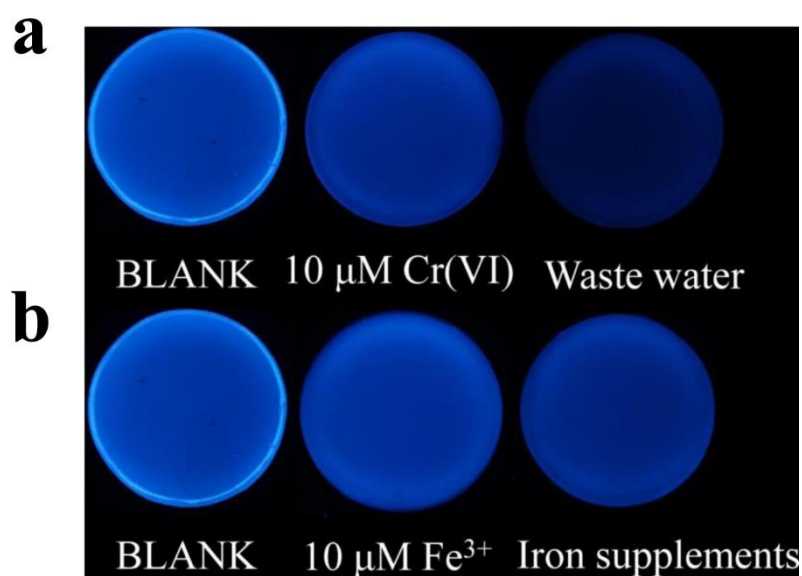

**Figure S10.** (a) Fluorescence comparison between FW-CDs hydrogels, FW-CDs hydrogels incubated with 10  $\mu$ M Cr(VI), and FW-CDs hydrogels incubated with wastewater, respectively; (b) Fluorescence comparison between FW-CDs hydrogels, FW-CDs hydrogels incubated with 10  $\mu$ M Fe<sup>3+</sup>, and FW-CDs hydrogels incubated with iron supplement, respectively.
